# Supplementary material
Source: publisher site journal article supplement (https://www.dovepress.com/article/428287)
Supplement: Supplementary file 1 [file get_supplementary_file.php]

**A Risk Score Based on Immune- and Oxidative Stress-Related LncRNAs Predicts Prognosis in Lung Adenocarcinoma: Insights from in Vitro Experiments and Large-Scale Transcriptome Analysis**

Xin Liu,#1,* Fangchao Zhao,#2,* Xiaodan Wang,#2,* Zheng Ma,2 Hongjiang Yan,2 Xuchao Lu,2 Shujun Li,2 Haiyong Zhu,#2,* Shaolin Gao2

1Second Department of Respiratory and Critical Care Medicine, The Second Hospital of Hebei Medical University, Shijiazhuang, Hebei, People’ Republic of China

2Department of Thoracic Surgery, The Second Hospital of Hebei Medical University, Shijiazhuang, Hebei, People’ Republic of China

#Contributed equally.

Correspondence: Shaolin Gao, Department of Thoracic Surgery, The Second Hospital of Hebei Medical University, No. 215 Heping West Road, Shijiazhuang, Hebei, People’ Republic of China, Tel/Fax +86-0311-66003588, Email [gaoshaolinHB2H@163.com](mailto:gaoshaolinHB2H@163.com)

*These authors contributed equally to this work

**
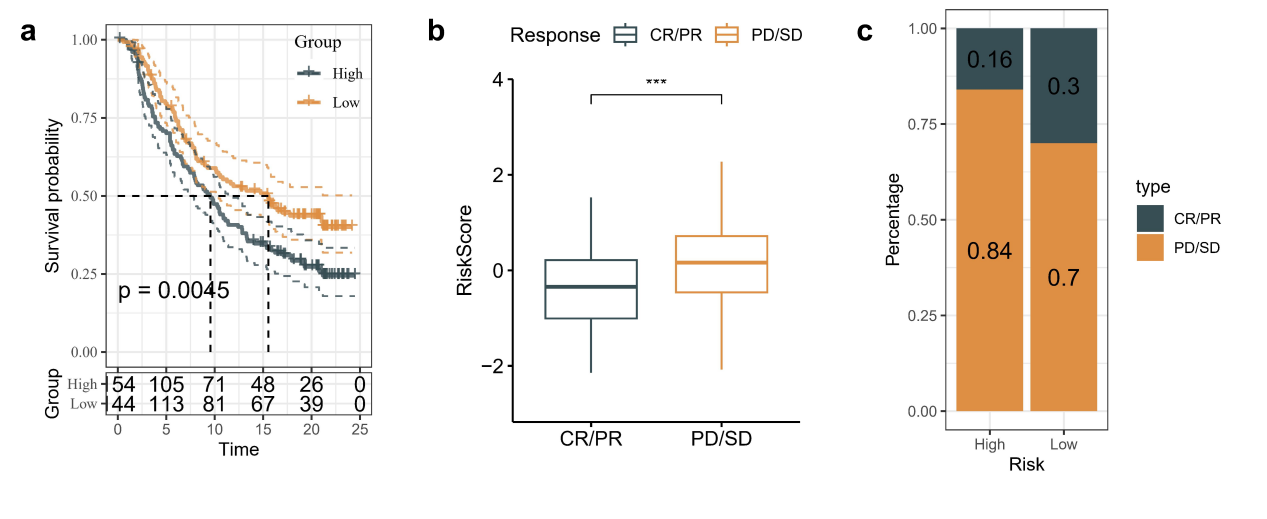
**

**Figure S1.** **External validation of risk signature.**

**(a)** K-M analysis in IMvigor-210 cohort. **(b)** Responses to immunotherapy in different groups. **(c)** Proportion of response to immunotherapy in different groups. ****p* < 0.001.

**Table S1.** **Clinical information in TCGA cohort.**

| **Characteristics** | **Low-risk**  **(n=249)** | **High-risk**  **(n=241)** | **P value** |
| --- | --- | --- | --- |
| Tumor.status, n (%) |  |  | 0.200 |
| TUMOR FREE | 149 (33.9%) | 126 (28.6%) |  |
| WITH TUMOR | 79 (18%) | 86 (19.5%) |  |
| Primary.therapy.outcome, n (%) |  |  | 0.012 |
| Complete Remission/Response | 172 (41.5%) | 134 (32.4%) |  |
| Stable Disease | 14 (3.4%) | 21 (5.1%) |  |
| Partial Remission/Response | 4 (1%) | 1 (0.2%) |  |
| Progressive Disease | 26 (6.3%) | 42 (10.1%) |  |
| Gender, n (%) |  |  | 0.004 |
| FEMALE | 149 (30.4%) | 113 (23.1%) |  |
| MALE | 100 (20.4%) | 128 (26.1%) |  |
| Race, n (%) |  |  | 0.206 |
| BLACK OR AFRICAN AMERICAN | 22 (5%) | 30 (6.9%) |  |
| WHITE | 199 (45.6%) | 177 (40.6%) |  |
| ASIAN | 2 (0.5%) | 5 (1.1%) |  |
| AMERICAN INDIAN OR ALASKA NATIVE | 0 (0%) | 1 (0.2%) |  |
| Age, median (IQR) | 66 (59, 73) | 66 (59, 72) | 0.355 |
| OS.time, median (IQR) | 747 (487, 1235) | 592 (354, 1013) | < 0.001 |
| vital_status.x, n (%) |  |  | 0.021 |
| Alive | 200 (40.8%) | 172 (35.1%) |  |
| Dead | 49 (10%) | 69 (14.1%) |  |
| Pathologic_M, n (%) |  |  | 0.358 |
| M0 | 165 (34%) | 159 (32.7%) |  |
| MX | 74 (15.2%) | 64 (13.2%) |  |
| M1 | 6 (1.2%) | 11 (2.3%) |  |
| M1b | 2 (0.4%) | 3 (0.6%) |  |
| M1a | 0 (0%) | 2 (0.4%) |  |
| Pathologic_N, n (%) |  |  | 0.011 |
| N0 | 176 (36%) | 141 (28.8%) |  |
| N1 | 42 (8.6%) | 50 (10.2%) |  |
| N2 | 23 (4.7%) | 45 (9.2%) |  |
| NX | 7 (1.4%) | 3 (0.6%) |  |
| N3 | 1 (0.2%) | 1 (0.2%) |  |
| Pathologic_T, n (%) |  |  | 0.013 |
| T1b | 34 (6.9%) | 19 (3.9%) |  |
| T1 | 41 (8.4%) | 23 (4.7%) |  |
| T4 | 7 (1.4%) | 11 (2.2%) |  |
| T2a | 42 (8.6%) | 38 (7.8%) |  |
| T2 | 68 (13.9%) | 88 (18%) |  |
| T1a | 28 (5.7%) | 18 (3.7%) |  |
| T2b | 13 (2.7%) | 14 (2.9%) |  |
| T3 | 15 (3.1%) | 28 (5.7%) |  |
| TX | 1 (0.2%) | 2 (0.4%) |  |
| Pathologic_stage, n (%) |  |  | < 0.001 |
| Stage IA | 84 (17.2%) | 44 (9%) |  |
| Stage IIIA | 25 (5.1%) | 44 (9%) |  |
| Stage IB | 67 (13.7%) | 64 (13.1%) |  |
| Stage IIB | 27 (5.5%) | 39 (8%) |  |
| Stage IIA | 25 (5.1%) | 23 (4.7%) |  |
| Stage IV | 8 (1.6%) | 17 (3.5%) |  |
| Stage I | 2 (0.4%) | 2 (0.4%) |  |
| Stage IIIB | 4 (0.8%) | 6 (1.2%) |  |
| Discrepancy | 6 (1.2%) | 1 (0.2%) |  |
| Stage II | 1 (0.2%) | 0 (0%) |  |
| Residual_tumor, n (%) |  |  | 0.934 |
| R0 | 167 (45.5%) | 161 (43.9%) |  |
| RX | 12 (3.3%) | 11 (3%) |  |
| R1 | 7 (1.9%) | 6 (1.6%) |  |
| R2 | 1 (0.3%) | 2 (0.5%) |  |
